# Supplementary material for: Thromboelastometry and Platelet Function during Acclimatization to High Altitude
Source: PubMed Central journal article supplement (PMC6260116; doi:10.1160/th17-02-0138), 2018-01-05
Supplement: 10-1160-th17-02-0138-s170138.pdf [file 10-1160-th17-02-0138-s170138.pdf]

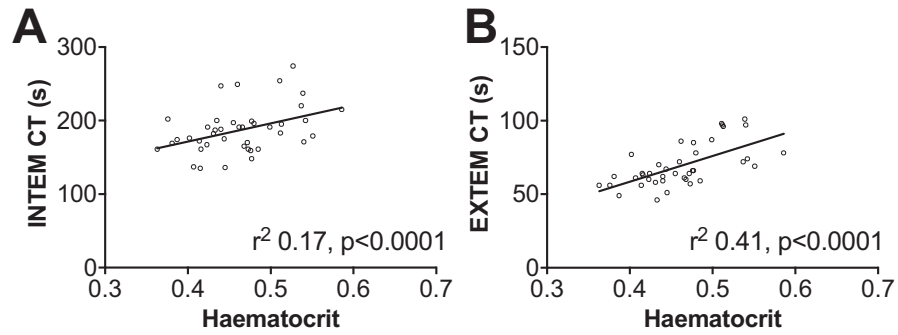

**Supplemental Figure 1** Correlations between haematocrit and TEM clotting time (CT). (A, B) Correlations between haematocrit (pooling values from sea level and day 7 at 5200 m) and INTEM CT (A) and EXTEM CT (B) on Apex 4.

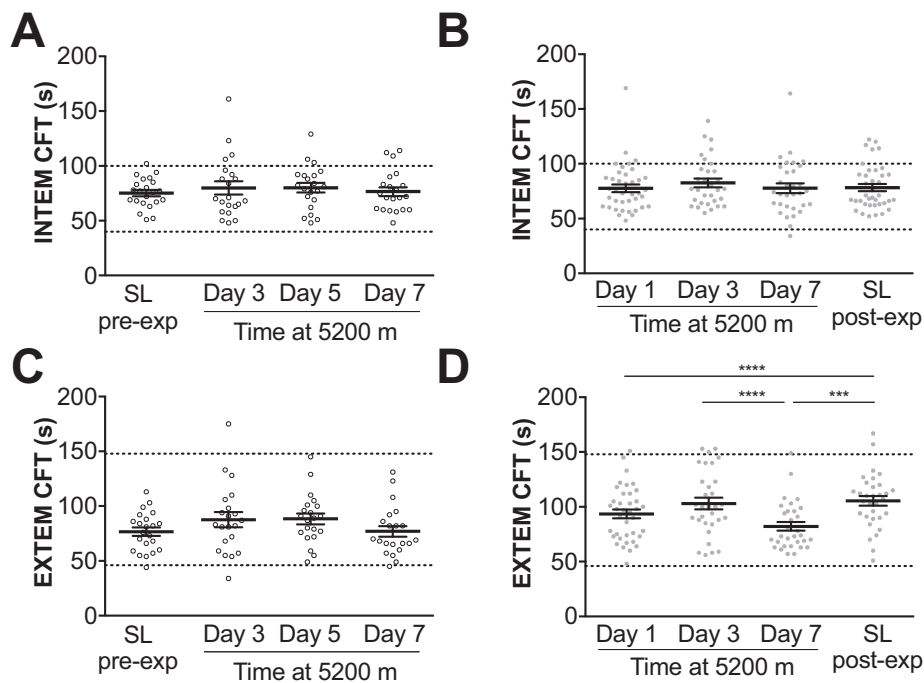

**Supplemental Figure 2** Thromboelastometry measurements of clot formation time (CFT). Whole blood was analysed using thromboelastometry on Apex 4 (A, C) and Apex 2 (B, D) using INTEM (A, B) or EXTEM (C, D). Clot formation time (CFT) is the time taken from a thromboelastometry trace amplitude of 2 mm above baseline to 20 mm above baseline. Data are mean (horizontal bars)  $\pm$  SEM. \* $p < 0.05$  using paired t-tests corrected for multiple comparisons.
